# Supplementary material
Source: Springer Nature journal article supplement (https://www.springermedizin.de/resource/supplementary/12888_2011_1001_MOESM1_ESM.pdf/9479454)
Supplement: MOESM1 [file 9479454]

140 Subjects  
screened

```
graph TD; A[140 Subjects screened] --> B[98 Subjected Entered]; B --> C[26 PFT+PLB]; C --> D[23 PFT+DEX];
```

98 Subjected  
Entered

26  
PFT+PLB

23  
PFT+DEX
